# Supplementary material
Source: Springer Nature journal article supplement (https://www.springermedizin.de/resource/supplementary/12889_2011_3695_MOESM1_ESM.pdf/9489818)
Supplement: MOESM1 [file 9489818]

|                                   |                                                                                                                                                                                                                                                                                                                                                                                                                                                                |                                                                                                                                                                                                                                                                                                            |                                                                                                                               |
|-----------------------------------|----------------------------------------------------------------------------------------------------------------------------------------------------------------------------------------------------------------------------------------------------------------------------------------------------------------------------------------------------------------------------------------------------------------------------------------------------------------|------------------------------------------------------------------------------------------------------------------------------------------------------------------------------------------------------------------------------------------------------------------------------------------------------------|-------------------------------------------------------------------------------------------------------------------------------|
| <b>Clinical Care: Inpatient</b>   | <b>1. Childbirth Care</b>                                                                                                                                                                                                                                                                                                                                                                                                                                      | <b>2. Newborn Baby and Child Care</b>                                                                                                                                                                                                                                                                      | <b>Essential newborn and maternal care training; refresher training; monthly meeting; Management Information System (MIS)</b> |
|                                   | <i>Skilled obstetric care at birth</i><br><i>Essential newborn care for neonates (hygiene, warmth, breastfeeding) and resuscitation</i><br><i>Referral for complications and blood transfusion for emergency obstetric care</i><br><b>Adherence with infection prevention protocol</b>                                                                                                                                                                         | Emergency care<br><br>Case management of neonatal and childhood illnesses<br><br><b>Kangaroo mother care for preterm and /or low birth weight (LBW) babies</b><br><br><b>Adherence with infection prevention protocol</b>                                                                                  |                                                                                                                               |
|                                   | <b>3. Antenatal Care</b>                                                                                                                                                                                                                                                                                                                                                                                                                                       | <b>4. Postnatal Care</b>                                                                                                                                                                                                                                                                                   |                                                                                                                               |
|                                   | <i>Four focused visits integrated with risk tracking and its management</i><br><b>Routine ultra-sonogram</b><br>Tetanus immunization and <b>de-worming</b><br><i>Referral to next level for complication</i>                                                                                                                                                                                                                                                   | <i>Promotion of healthy behaviors for mother and newborn</i><br><br><b>Early detection and referral of complications</b><br><br><b>Extra visits for preterm babies</b>                                                                                                                                     |                                                                                                                               |
| <b>Family / or Community Care</b> | <b>5. Pregnancy Care</b>                                                                                                                                                                                                                                                                                                                                                                                                                                       | <b>6. Postnatal and Child Care</b>                                                                                                                                                                                                                                                                         |                                                                                                                               |
|                                   | <b>Home-based life saving skills for pregnant women and their support person</b><br><b>Pregnancy home visit at 12-14 weeks &amp; 32-34 weeks</b><br><i>Recognition of danger signs, Supporting referral system</i><br><i>Community dissemination/community leaders orientation meeting</i><br><i>Emergency transport</i><br>Iron- folate supplementation<br><i>Distribution of delivery kit</i><br><b>Risk tracking and counseling</b><br>Tetanus immunization | <b>Post pregnancy home visits at 0, 3, 7 and 28 days</b><br><br>Healthy home behaviors including: <b>exclusive breastfeeding, care of cord and skin, extra care for preterm and/or LBW babies</b><br><br><b>Promotion of demand for facility-based care, recognition of danger signs, and care-seeking</b> |                                                                                                                               |
